# Supplementary material
Source: PubMed Central journal article supplement (PMC4220270)
Supplement: NIHMS632521-supplement-1.pdf [file NIHMS632521-supplement-1.pdf]

Fig. S1

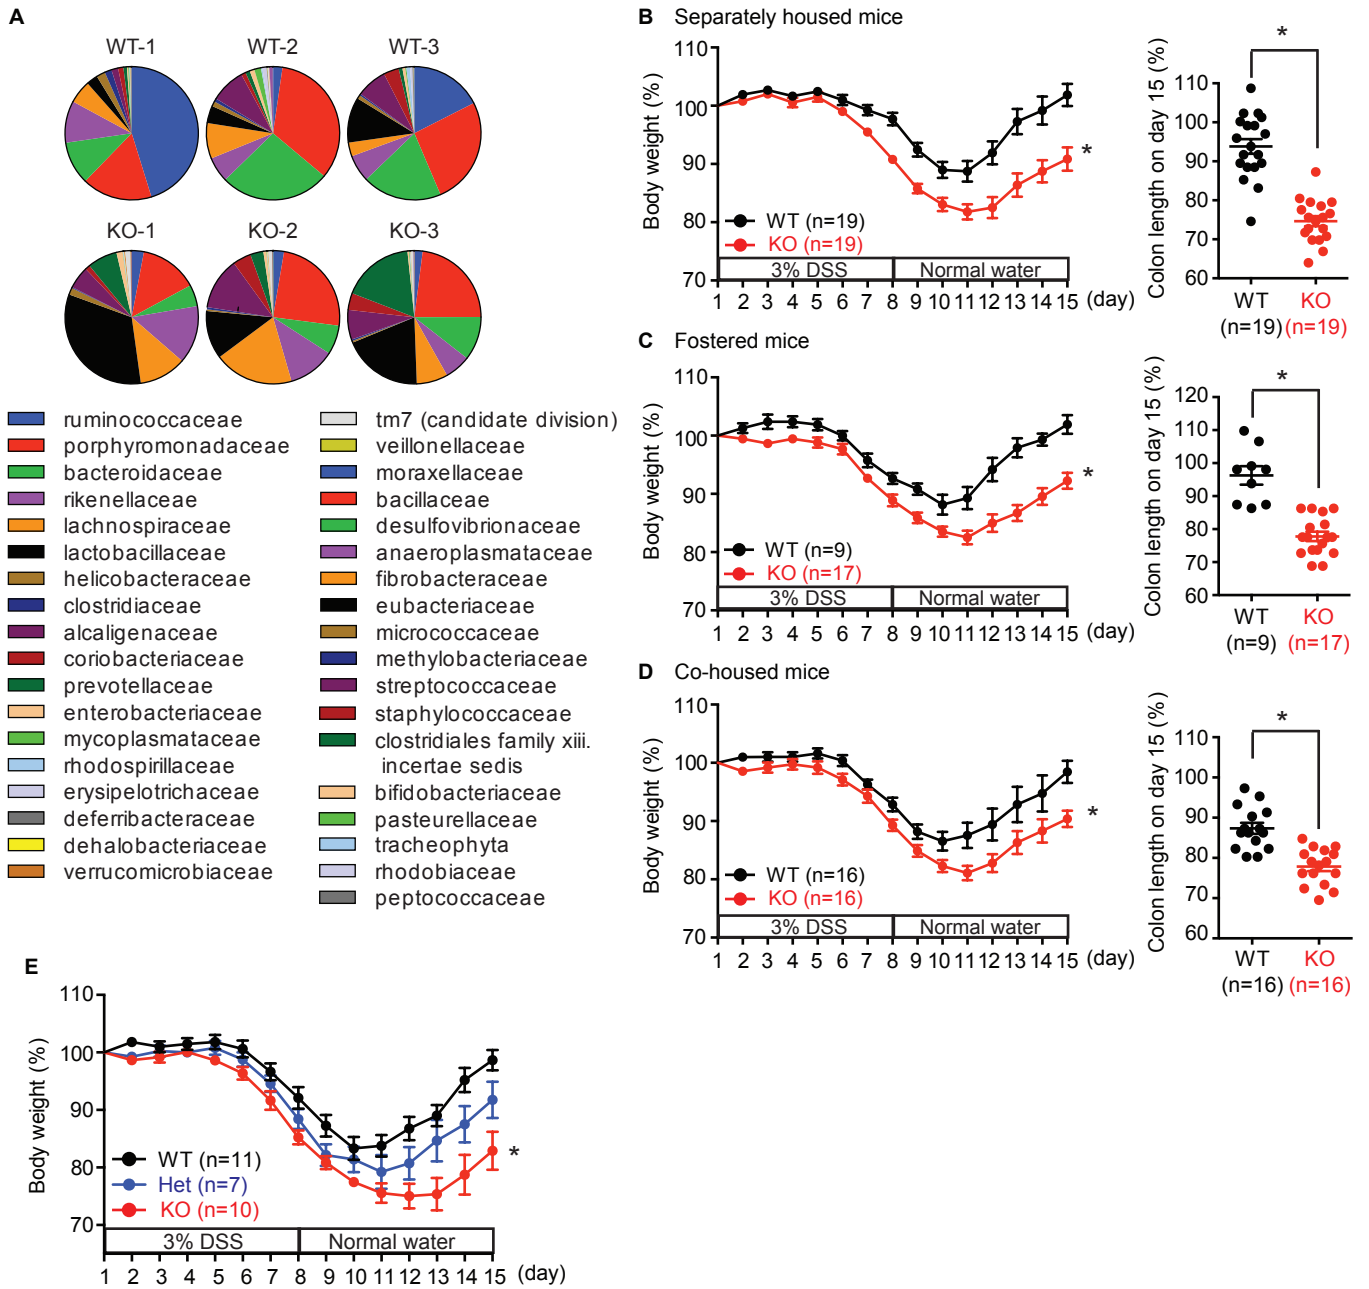

**Figure S1, *Ripk3*<sup>-/-</sup> mice were sensitive to DSS-induced colitis, Related to Figure 1.**

**(A)** Metagenomic analysis using gDNA from feces from separately-housed *Ripk3*<sup>+/+</sup> (WT) and *Ripk3*<sup>-/-</sup> (KO) mice was performed. Three mice of each genotype from different cages were used. The pie charts made by the percentage of each bacterial family colored according to the legend are shown. Detailed result is found in Table S1. **(B)** Separately-housed *Ripk3*<sup>+/+</sup> and *Ripk3*<sup>-/-</sup> mice were given DSS. **(C)** *Ripk3*<sup>+/+</sup> and *Ripk3*<sup>-/-</sup> mice were nursed by the same foster mother in the same cage after birth. After weaning, bedding materials from different cages were mixed twice a week to further minimize differences in intestinal microbial environment. **(D)** *Ripk3*<sup>+/+</sup> and *Ripk3*<sup>-/-</sup> mice were co-housed in same cage for four weeks prior to and during DSS treatment. Left and right panels in **B**, **C**, and **D** show body weight and colon length, respectively. **(E)** DSS-induced body weight loss in *Ripk3*<sup>-/-</sup> mice was compared to their littermate *Ripk3*<sup>+/+</sup> and *Ripk3*<sup>+/-</sup> (Het) mice ( $p < 0.05$ , WT vs KO;  $p = 0.0589$ , WT vs Het). The numbers in parentheses represent the number of mice used in each group. The data were obtained from 2-4 independent experiments. Each dot represents one mouse; bars = mean  $\pm$  SEM. Asterisks:  $p < 0.05$ .

Fig. S2

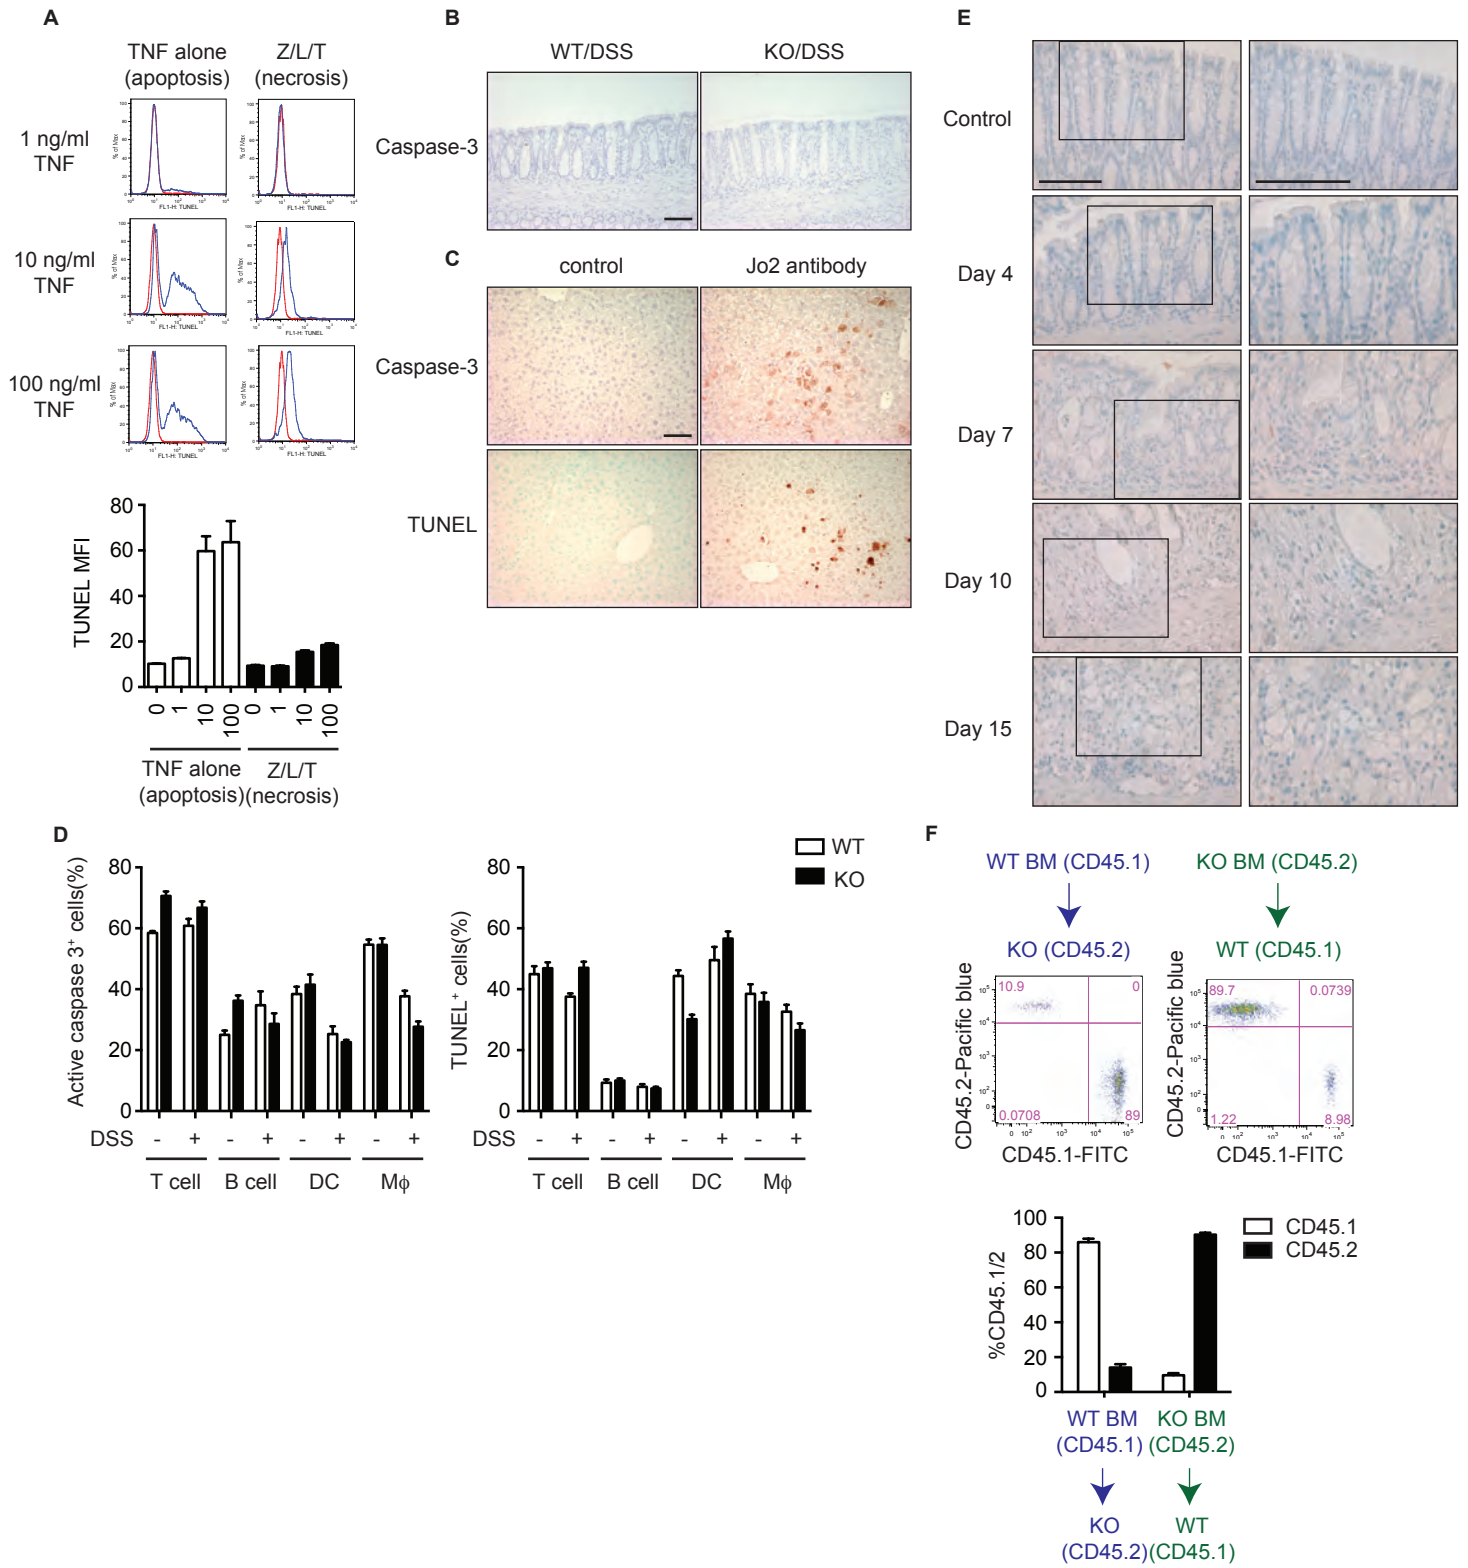

**Figure S2, RIPK3 did not contribute to initial colon epithelial injury in response to DSS, Related to Figure 2.**

(A) TNFR2-overexpressing Jurkat cells (4E3) were stimulated with various concentration of TNF (T) in the absence/presence of 20  $\mu$ M z-VAD-fmk (Z) and 5  $\mu$ M Smac mimetic (LBW242; L). Fourteen hours after stimulation, the cells were subjected to TUNEL staining. Representative FACS plots were shown. Red and blue lines indicate the untreated or TNF-treated samples, respectively. Mean fluorescence intensity (MFI) of TUNEL-positive cells were shown on the bottom. The experiment was performed with triplicate samples. (B) Representative pictures of caspase-3 staining of colon tissues harvested from DSS-treated *Ripk3*<sup>+/+</sup> (WT) and *Ripk3*<sup>-/-</sup> (KO) mice on day 4. (C) Representative pictures of caspase-3 and TUNEL staining of liver tissues harvested from wild type mice injected with anti-Fas antibody (Jo2; 0.5 mg/kg) are shown. (D) The percentage of active caspase 3 (left panel) or TUNEL positive cells (right panel) in lamina propria T cell, B cell, DC, and macrophage (M $\phi$ ) from DSS-treated *Ripk3*<sup>+/+</sup> and *Ripk3*<sup>-/-</sup> mice (day 7) were determined by flow cytometry. CD45<sup>+</sup>CD3<sup>+</sup>, CD45<sup>+</sup>CD19<sup>+</sup>, CD45<sup>+</sup>CD3<sup>-</sup>CD19<sup>-</sup>CD11c<sup>+</sup>, and CD45<sup>+</sup>CD3<sup>-</sup>CD19<sup>-</sup>CD11c<sup>-</sup>CD11b<sup>+</sup> cells were defined as T cell, B cell, DC, and M $\phi$ , respectively. Data were obtained from 3-4 mice for each sample. (E) Colon tissues from DSS-treated *Ripk3*<sup>-/-</sup> mice were stained with anti-RIPK3 antibody. The area in the square in left panels is magnified in right panels. (F) BM reconstitution in BM chimeric mice (n=3) was verified by flow cytometry. Scale bars represent 75  $\mu$ m. Results shown are mean  $\pm$  SEM.

Fig. S3

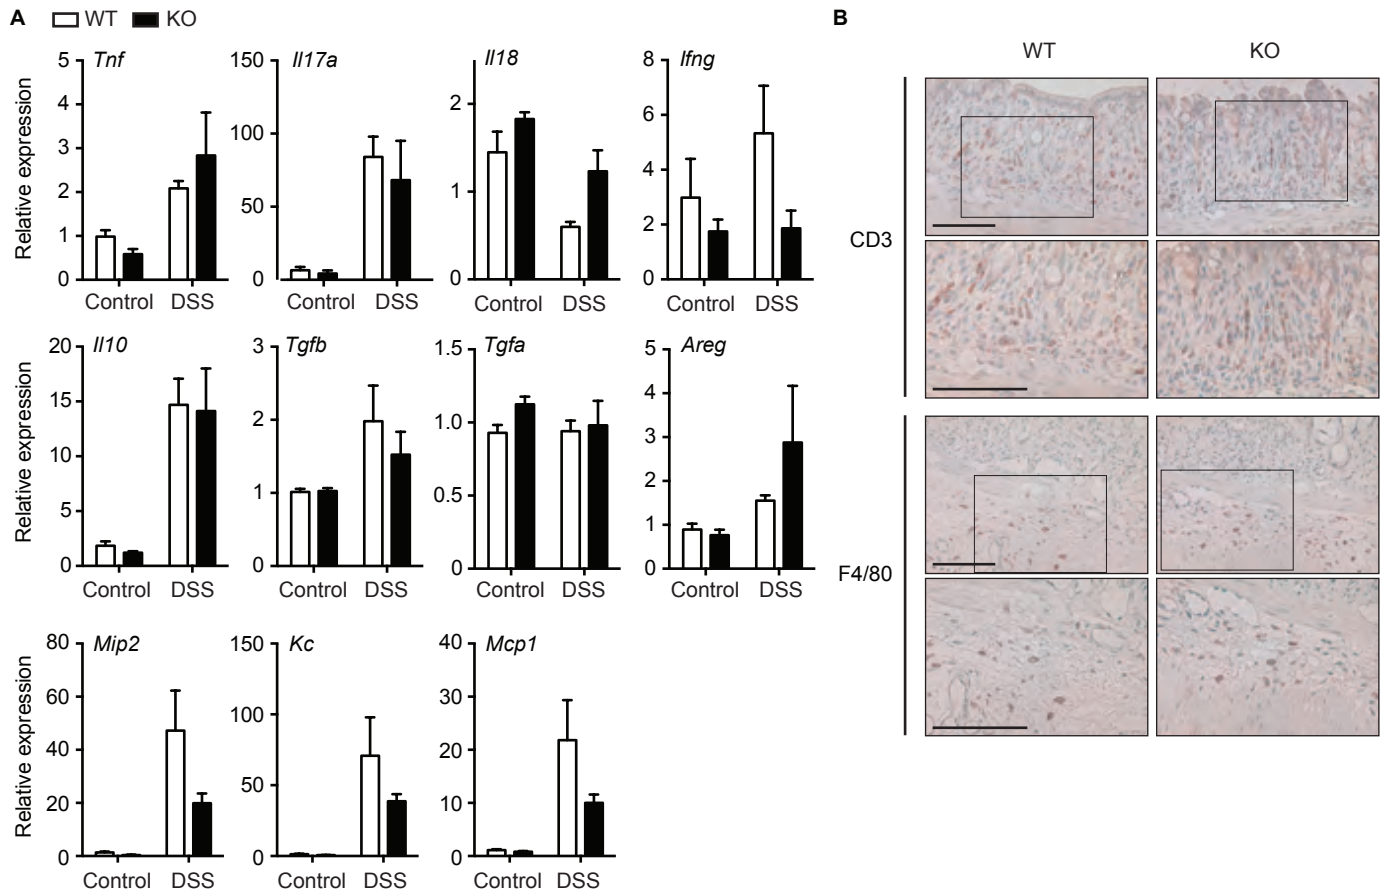

**Figure S3, Cytokine expression and normal recruitment of immune cells in colon tissues of DSS-treated *Ripk3*<sup>+/+</sup> and *Ripk3*<sup>-/-</sup> mice, Related to Figure 3.**

(A) Relative mRNA expression of various cytokines in DSS-treated *Ripk3*<sup>+/+</sup> and *Ripk3*<sup>-/-</sup> colon on day 7 (n=5-12). (B) Representative pictures of immunohistochemistry using anti-CD3 and anti-F4/80 antibodies in colon tissues from DSS-treated *Ripk3*<sup>+/+</sup> (WT) and *Ripk3*<sup>-/-</sup> (KO) mice on day 7. Lower panels show the magnified versions of the areas marked by the squares in upper panels. Scale bars represent 75  $\mu$ m. Results shown are mean  $\pm$  SEM.

Fig. S4

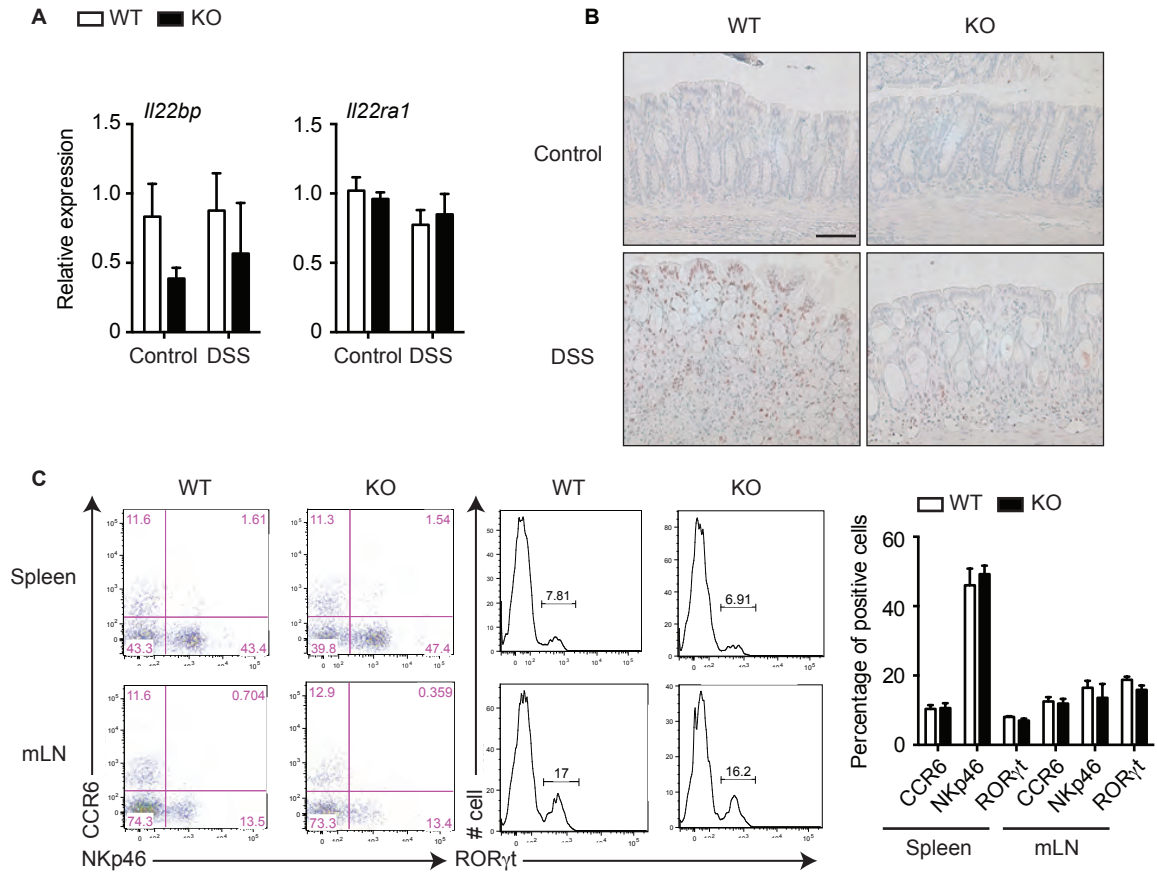

**Figure S4, Normal differentiation of innate lymphoid cells in *Ripk3*<sup>-/-</sup> mice, Related to Figure 4.**

(A) Relative mRNA expression of *Il22bp* and *Il22ra1* in DSS-treated *Ripk3*<sup>+/+</sup> and *Ripk3*<sup>-/-</sup> colon on day 7 (n=5-12). (B) Phospho-STAT3 in *Ripk3*<sup>+/+</sup> (WT) and *Ripk3*<sup>-/-</sup> (KO) colon sections on day 7. Scale bar represents 75 μm. (C) Expression of CCR6, NKp46, and RORγt on CD3<sup>-</sup>CD19<sup>-</sup>CD11b<sup>-</sup>IL-7R<sup>+</sup> cells in the spleen and mesenteric lymph nodes (mLN) was examined in *Ripk3*<sup>+/+</sup> and *Ripk3*<sup>-/-</sup> mice (n=3). Representative FACS plots and percentage of cells expressing CCR6, NKp46, or RORγt are shown. Results shown are mean ± SEM.



Fig. S5

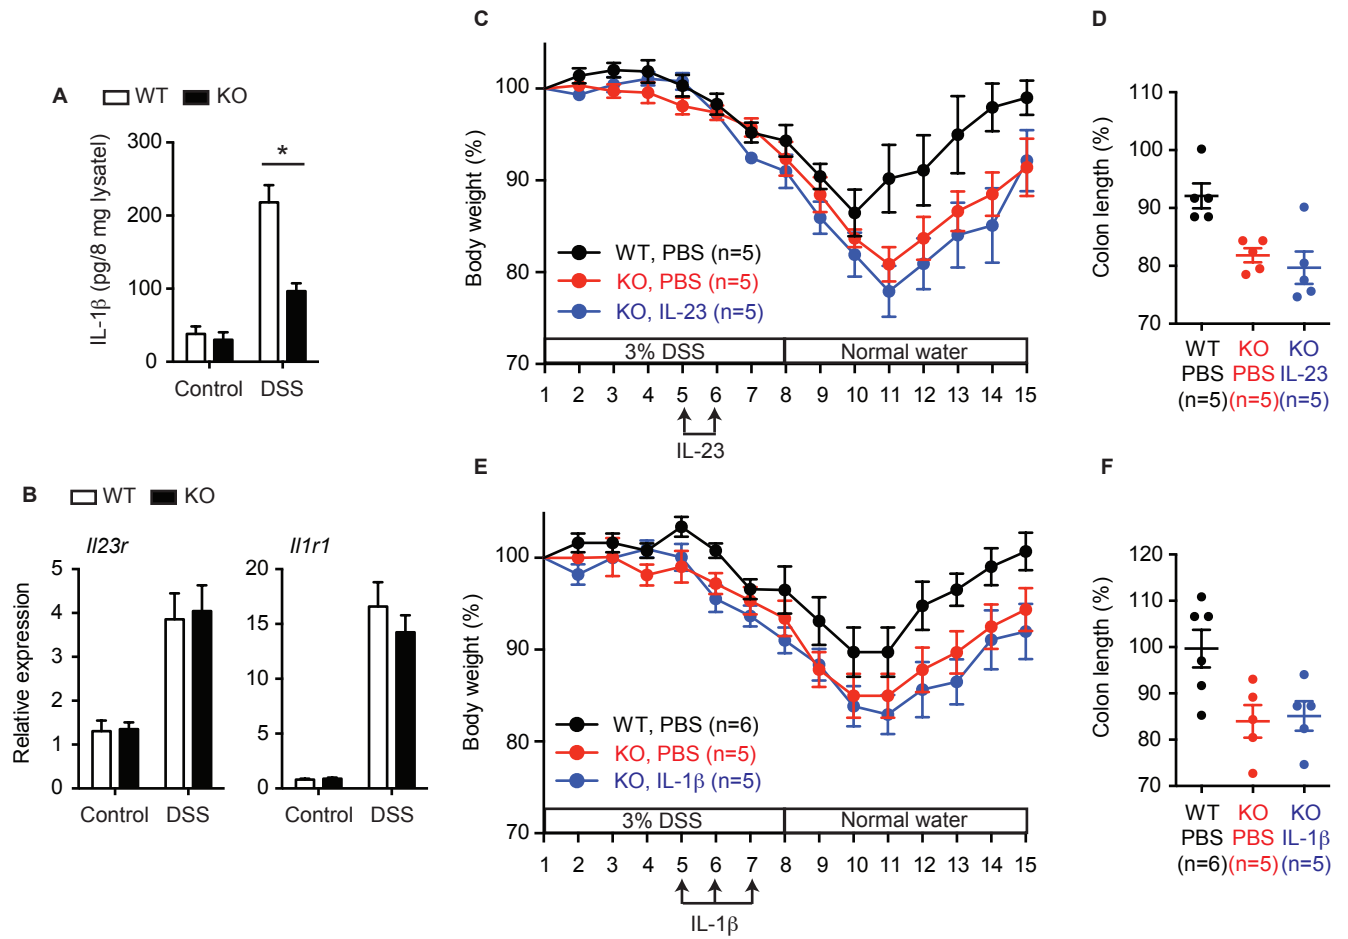

**Figure S5, Recombinant IL-23 or IL-1 $\beta$  alone did not rescue severe DSS-induced colitis in *Ripk3*<sup>-/-</sup> mice, Related to Figure 5.**

(A) Protein and (B) RNA extracted from colon tissues of DSS-treated *Ripk3*<sup>+/+</sup> (WT) and *Ripk3*<sup>-/-</sup> (KO) mice on day 7 were subjected to reverse transcription followed by qPCR (n=5-12) and ELISA (n=3-6), respectively. (C-D) Recombinant IL-23 (1  $\mu$ g/injection) or (E-F) IL-1 $\beta$  (50 ng/injection) was i.p. injected to *Ripk3*<sup>-/-</sup> mice. As control, the equivalent volume of PBS was injected to *Ripk3*<sup>+/+</sup> and *Ripk3*<sup>-/-</sup> mice. The number in parentheses represents the number of mice used. Results shown are mean  $\pm$  SEM. Asterisks:  $p < 0.05$ .

Fig. S6

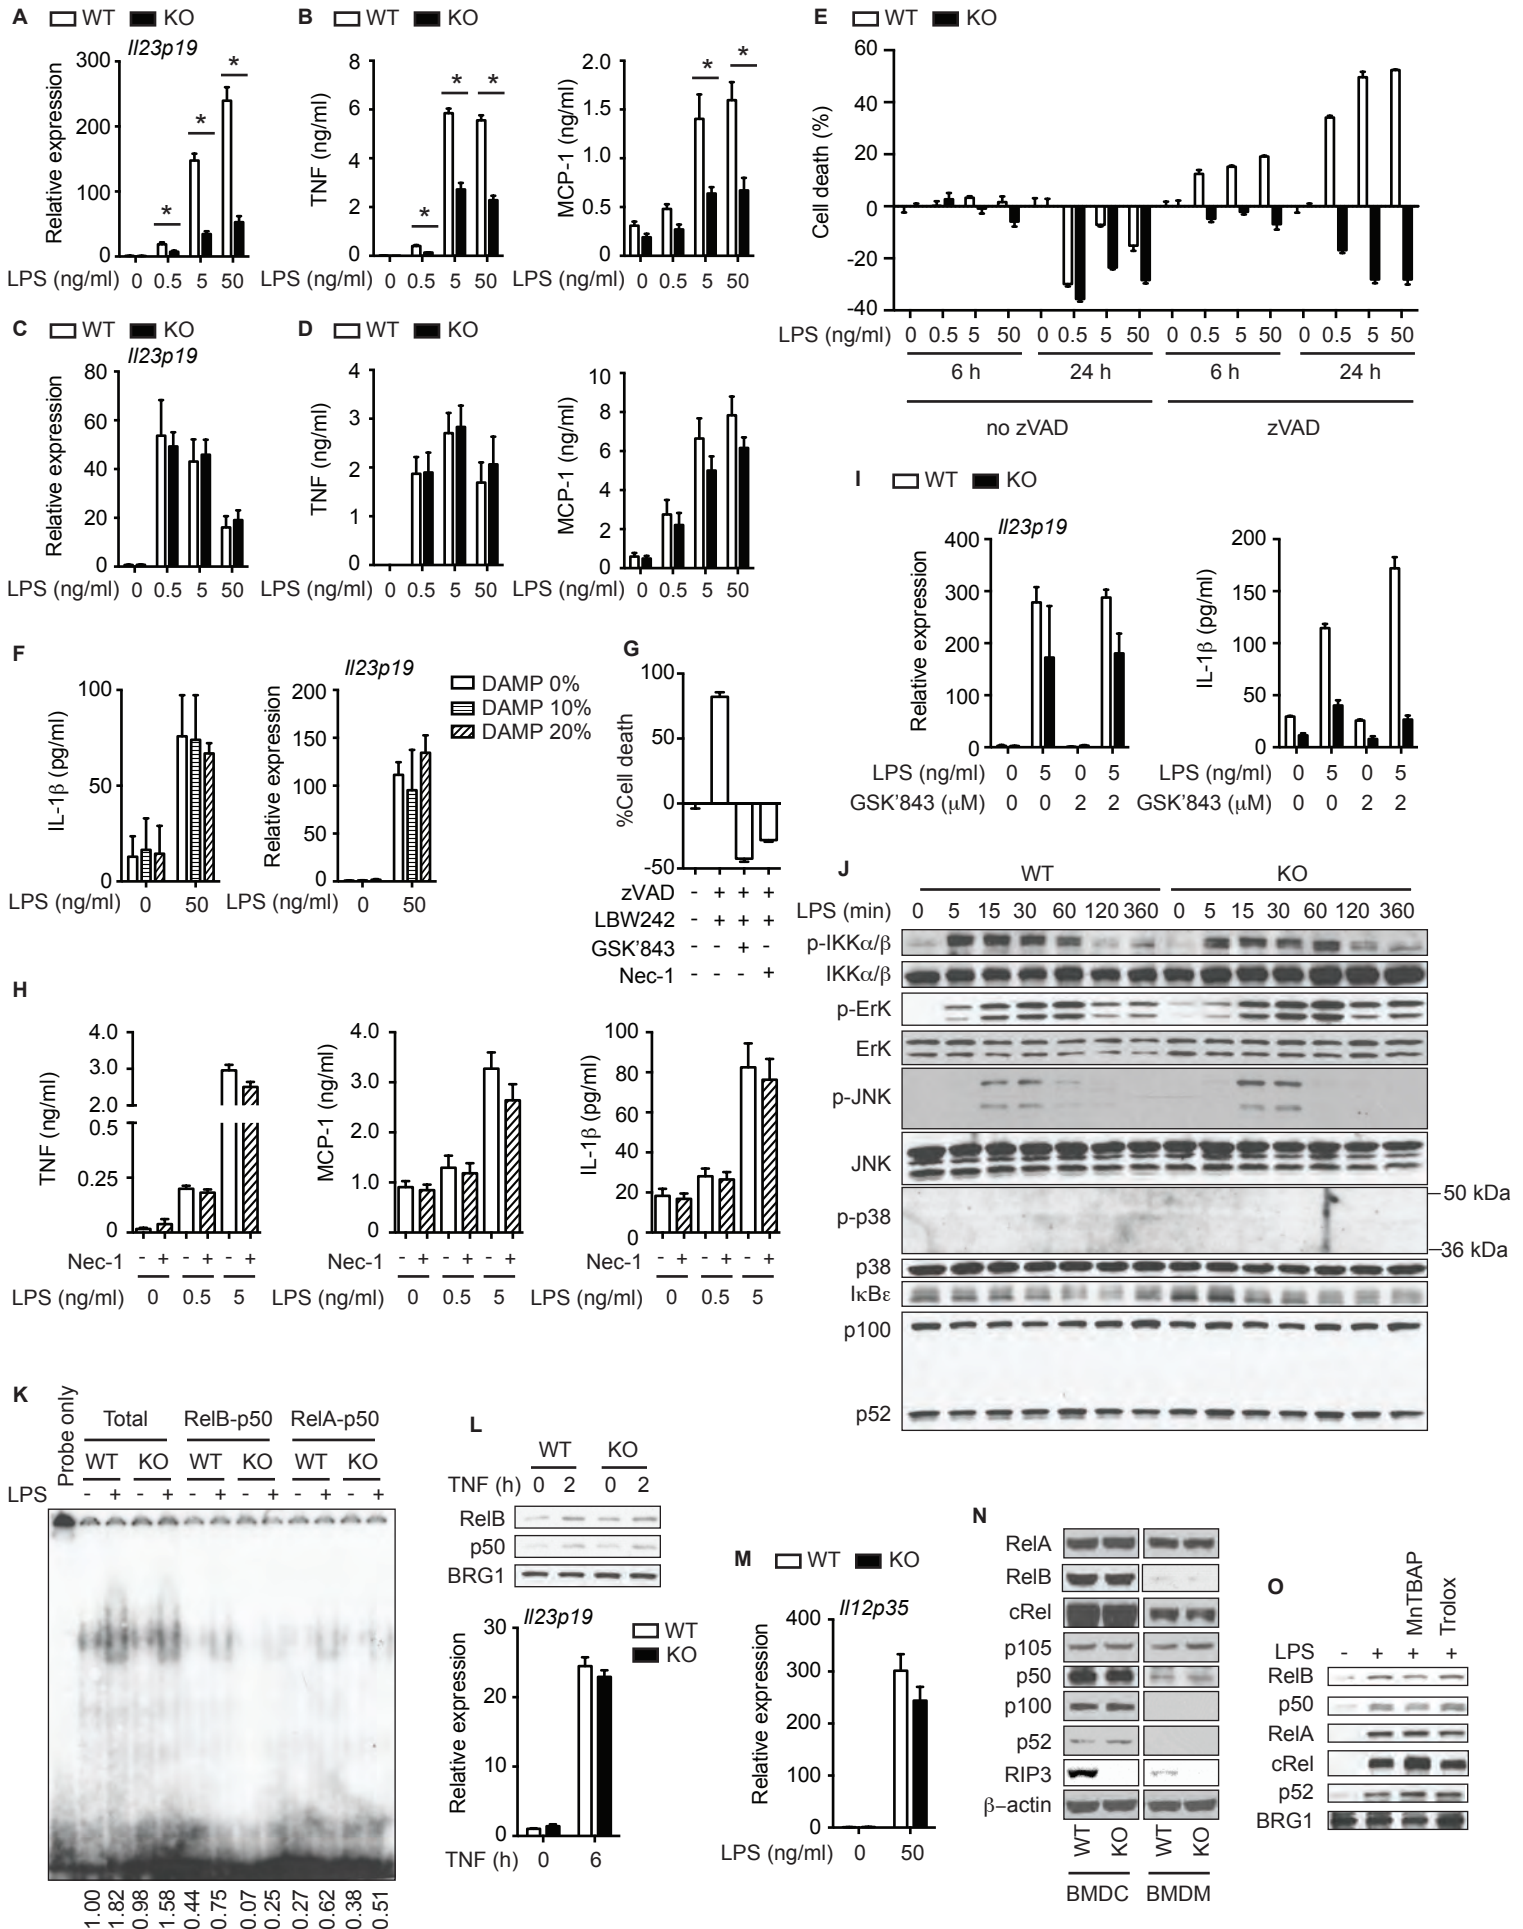

**Figure S6, LPS-induced cytokine expression in *Ripk3*<sup>+/+</sup> and *Ripk3*<sup>-/-</sup> BMDCs and BMDMs, Related to Figure 6.**

(A-D) Cytokine expression in (A-B) *Ripk3*<sup>+/+</sup> (WT) and *Ripk3*<sup>-/-</sup> (KO) BMDCs and (C-D) BMDMs treated with LPS for 6 hours (n=4). (E) After LPS stimulation of BMDCs with or without z-VAD-fmk (zVAD), cell death was determined by Annexin V and PI staining. Change in percentage of cell death relative to untreated sample is shown. (F) Wild type BMDCs were subjected to 5 times freeze-thaw cycles and subsequently the supernatant was collected as necrotic supernatant, referred to as DAMP in the panel. LPS-induced cytokine expression was examined in the presence of the necrotic supernatant from the equivalent of 10% or 20% of total cells plated (n=3). (G) LDH assay in DC2.4 cells treated with 20  $\mu$ M zVAD, 0.1  $\mu$ M LBW242, 2  $\mu$ M GSK'843, and/or 30  $\mu$ M Nec-1. (H-I) Cytokine expression in BMDCs pretreated with 30  $\mu$ M Nec-1 (n=7) or 2  $\mu$ M GSK'843 (n=3) and then treated with LPS for 6 hours. (J) Whole cell extracts from BMDCs treated with 100 ng/ml LPS were subjected to western blot analyses. (K) Nuclear extracts from BMDCs treated with 100 ng/ml LPS for 2 hours were subjected to EMSA after immune depletion with anti-RelA, cRel, and p52 or anti-RelB, cRel, and p52 antibodies. Relative intensities of signal are shown by defining the intensity of the second lane from left-end as 1. The signals at the bottom are derived from free probe. (L) Nuclear translocation of RelB and p50 and cytokine expression (n=4) were examined in BMDCs treated with 250 ng/ml TNF. (M) Relative *Il12p35* expression level in BMDCs treated with LPS for 6 hours (n=6). (N) WCEs from BMDCs and BMDMs were subjected to western blot analyses. The lanes were run on the same gel but were noncontiguous. (O) Nuclear extracts from wild type BMDCs pretreated with 100  $\mu$ M MnTBAP or Trolox and then treated with 100 ng/ml LPS for 2 hours were subjected to western blot analyses. Results shown are mean  $\pm$  SEM. Asterisks:  $p < 0.05$ .

Fig. S7

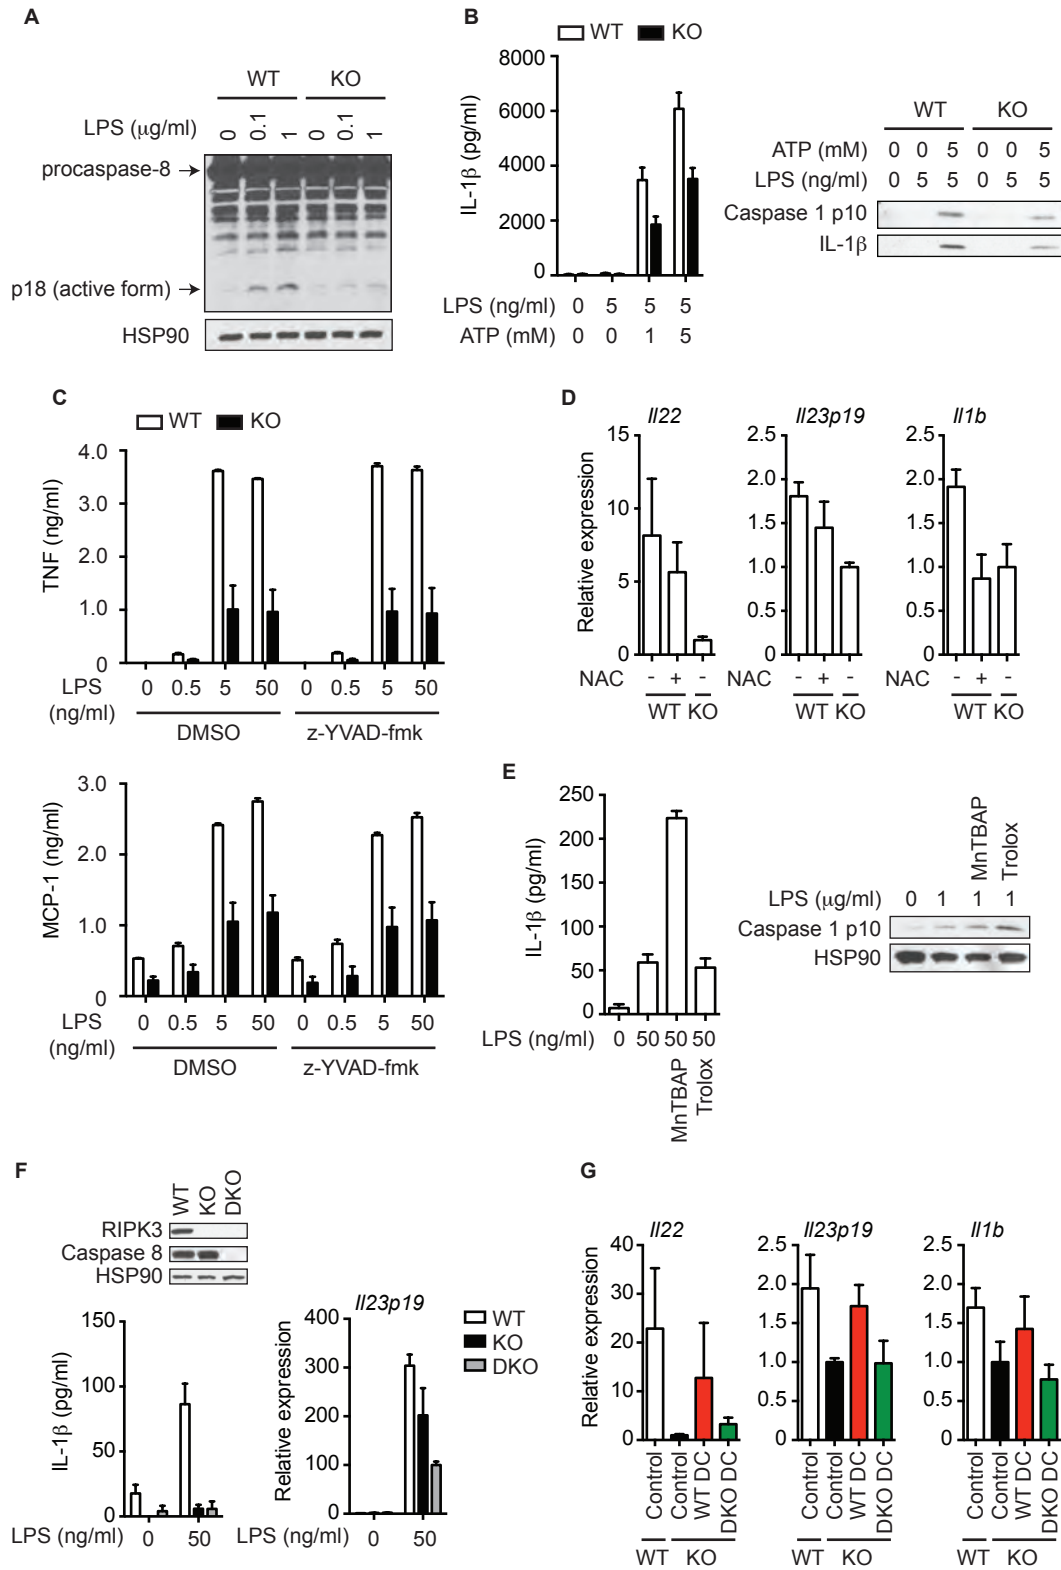

**Figure S7. NAC injection partly blocked DSS-induced cytokine expression, Related to Figure 7.**

**(A)** Whole cell extracts (WCEs) from *Ripk3*<sup>+/+</sup> (WT) and *Ripk3*<sup>-/-</sup> (KO) BMDCs treated with LPS for 1 hour were tested by western blot analysis. **(B)** BMDCs were primed with LPS for 2.5 hours and then stimulated with ATP for 30 min. Supernatants were subjected to ELISA (n=7) or western blot analysis. **(C)** BMDCs pretreated with 5  $\mu$ M z-YVAD-fmk for 1 hour were stimulated with LPS for 6 hours. Cytokine expression was determined by ELISA (n=2). **(D)** Relative mRNA expression of *Il22*, *Il23p19* and *Il1b* in DSS-treated mice (day 7). NAC was i.p. injected to *Ripk3*<sup>+/+</sup> mice on day 4, 5, and 6 (200 mg/kg) (n=4). PBS was injected into control mice (control *Ripk3*<sup>+/+</sup>: n=4, control *Ripk3*<sup>-/-</sup>: n=5). Gene expression in *Ripk3*<sup>-/-</sup> PBS control was defined as 1. **(E)** IL-1 $\beta$  secretion (n=3) and caspase 1 activation were tested in wild type BMDCs pretreated with 100  $\mu$ M MnTBAP or Trolox for 1 hour and then treated with LPS. **(F)** Relative expression of *Il23p19* and IL-1 $\beta$  secretion in *Ripk3*<sup>+/+</sup> *Casp8*<sup>+/+</sup> (WT), *Ripk3*<sup>-/-</sup> *Casp8*<sup>+/+</sup> (KO), and *Ripk3*<sup>-/-</sup> *Casp8*<sup>-/-</sup> (DKO) BMDCs treated with LPS for 6 hours. Deficiency of the expression of RIPK3 and caspase 8 was confirmed by western blot analysis. **(G)** *Ripk3*<sup>+/+</sup> *Casp8*<sup>+/+</sup> (WT: n=5) or *Ripk3*<sup>-/-</sup> *Casp8*<sup>-/-</sup> (DKO: n=6) BMDCs were injected to *Ripk3*<sup>-/-</sup> mice on day 5. PBS was injected into control mice (*Ripk3*<sup>+/+</sup>: n=4, *Ripk3*<sup>-/-</sup>: n=5). Relative mRNA expression of *Il22*, *Il23p19* and *Il1b* in the colon is shown (day 7). Gene expression in *Ripk3*<sup>-/-</sup> PBS control was defined as 1.

**Table S1. Metagenomic analysis for intestinal microbiota in *Ripk3*<sup>+/+</sup> and *Ripk3*<sup>-/-</sup> mice, Related to Figure 1.**

|                                           | <i>Ripk3</i> <sup>+/+</sup> |          |          | <i>Ripk3</i> <sup>-/-</sup> |          |          |
|-------------------------------------------|-----------------------------|----------|----------|-----------------------------|----------|----------|
|                                           | sample 1                    | sample 2 | sample 3 | sample 1                    | sample 2 | sample 3 |
| ruminococcaceae                           | 45.2103                     | 2.29816  | 17.5268  | 2.95393                     | 2.6677   | 2.01568  |
| porphyromonadaceae                        | 17.055                      | 33.8015  | 26.0694  | 14.1373                     | 24.3749  | 22.9264  |
| bacteroidaceae                            | 10.4513                     | 26.6114  | 19.2396  | 5.22396                     | 7.06026  | 10.6008  |
| rikenellaceae                             | 10.1702                     | 6.1301   | 6.56     | 14.0602                     | 11.412   | 6.30041  |
| lachnospiraceae                           | 5.59128                     | 8.63284  | 3.35233  | 11.4306                     | 19.2964  | 7.58286  |
| lactobacillaceae                          | 2.77595                     | 4.21538  | 11.0105  | 32.755                      | 11.6865  | 19.3626  |
| helicobacteraceae                         | 2.13742                     | 1.21058  | 0.89328  | 1.67849                     | 0.39761  | 0.38759  |
| clostridiaceae                            | 1.68182                     | 0.79074  | 0.41092  | 0.22489                     | 0.53831  | 0.39318  |
| alcaligenaceae                            | 1.64045                     | 8.44896  | 7.42672  | 5.41626                     | 12.596   | 7.20869  |
| coriobacteriaceae                         | 1.28205                     | 1.09072  | 3.70657  | 1.20265                     | 4.46291  | 4.09121  |
| prevotellaceae                            | 0.85686                     | 1.07252  | 0.90509  | 7.22511                     | 3.1746   | 17.4638  |
| enterobacteriaceae                        | 0.2916                      | 1.15724  | 0.69491  | 1.5063                      | 0.73241  | 0.35683  |
| mycoplasmataceae                          | 0.28761                     | 1.62038  | 0.26509  | 0.08474                     | 0.10301  | 0.17785  |
| rhodospirillaceae                         | 0.11265                     | 0.3301   | 0.91218  | 0.12168                     | 0.00628  | 0.08613  |
| erysipelotrichaceae                       | 0.08773                     | 1.02796  | 0.56915  | 0.07659                     | 0.13442  | 0.11298  |
| deferribacteraceae                        | 0.06979                     | 0.17321  | 0.28517  | 0.02716                     | 0.02764  | 0.04195  |
| dehalobacteriaceae                        | 0.05882                     | 0.0728   | 0.02834  | 0.06899                     | 0.08354  | 0.04698  |
| verrucomicrobiaceae                       | 0.05782                     | 0.01506  | 0.02598  | 0.23412                     | 0.10678  | 0.04922  |
| tm7 (candidate division)                  | 0.05732                     | 0.31127  | 0.02657  | 1.2184                      | 0.94723  | 0.51846  |
| veillonellaceae                           | 0.05483                     | 0.04268  | 0.00945  | 0.00054                     | 0.00063  | 0        |
| moraxellaceae                             | 0.04038                     | 0.00251  | 0.05373  | 0.06138                     | 0.11495  | 0.04307  |
| bacillaceae                               | 0.01495                     | 0.06903  | 0        | 0                           | 0.00063  | 0        |
| desulfovibrionaceae                       | 0.00598                     | 0.00439  | 0.01476  | 0.00706                     | 0.00628  | 0.00503  |
| anaeroplasmataceae                        | 0.00299                     | 0.80015  | 0.00059  | 0.00217                     | 0.0044   | 0.11521  |
| fibrobacteraceae                          | 0.0015                      | 0.00126  | 0.00295  | 0.20696                     | 0.03015  | 0.09844  |
| eubacteriaceae                            | 0.0015                      | 0.00126  | 0        | 0                           | 0        | 0.00056  |
| micrococcaceae                            | 0.001                       | 0.00314  | 0.00236  | 0.00706                     | 0.00188  | 0.00224  |
| methylobacteriaceae                       | 0.0005                      | 0.05021  | 0.00118  | 0.05649                     | 0.01696  | 0.00112  |
| streptococcaceae                          | 0.0005                      | 0.00879  | 0        | 0.00054                     | 0.00188  | 0.00112  |
| staphylococcaceae                         | 0                           | 0        | 0        | 0.00163                     | 0        | 0        |
| clostridiales family xiii. incertae sedis | 0                           | 0        | 0        | 0.00326                     | 0.01131  | 0.00503  |
| bifidobacteriaceae                        | 0                           | 0.00188  | 0        | 0                           | 0        | 0        |
| pasteurellaceae                           | 0                           | 0.00251  | 0.00236  | 0                           | 0.00063  | 0        |
| tracheophyta                              | 0                           | 0.00063  | 0        | 0.00109                     | 0.00063  | 0        |
| rhodobiaceae                              | 0                           | 0.00063  | 0.00413  | 0.00109                     | 0        | 0.00168  |
| peptococcaceae                            | 0                           | 0        | 0        | 0.00435                     | 0.00126  | 0.0028   |

The numbers show the percentage of each bacterial family.

**Table S2. Primer sequences used in this study.**

| Gene           |   | Sequences              | Gene           |   | Sequences                 |
|----------------|---|------------------------|----------------|---|---------------------------|
| <i>Areg</i>    | F | ATCATCCTCGCAGCTATTGG   | <i>Il22ra1</i> | F | CTACGTGTGCCGAGTGAAGA      |
|                | R | TTGTCCTCAGCTAGGCAATG   |                | R | AGCGTAGGGGTTGAAAGGT       |
| <i>Cox2</i>    | F | TGAGCACAGGATTTGACCAG   | <i>Il23p19</i> | F | CCAGCGGGACATATGAATCT      |
|                | R | CCTTGAAGTGGGTCAGGATG   |                | R | AGGCTCCCCTTTGAAGATGT      |
| <i>Ereg</i>    | F | CACCGAGAAAGAAGGATGGA   | <i>Il23r</i>   | F | CCACCAAACCTCCCAGACAG      |
|                | R | GATTCTCCTGGGATGCATGA   |                | R | GAAGACCATTCCCGACAAAA      |
| <i>Ifng</i>    | F | ACAGCAAGGCGAAAAAGGAT   | <i>Kc</i>      | F | CCACACTCAAGAATGGTCGC      |
|                | R | TGAGCTCATTGAATGCTTGG   |                | R | TCTCCGTTACTTGGGGACAC      |
| <i>Il1b</i>    | F | CCCAACTGGTACATCAGCAC   | <i>Mcp1</i>    | F | AGGTGTCCCAAAGAAGCTGTA     |
|                | R | TCTGCTCATTACGAAAAGG    |                | R | ATGTCTGGACCCATTCTTCT      |
| <i>Il1r1</i>   | F | GGAGAAATGTCGCTGGATGT   | <i>Mip2</i>    | F | GAGCTTGAGTGTGACGCCCCCAGG  |
|                | R | ATGAGACAAATGAGCCCCAG   |                | R | GTTAGCCTTGCCTTTGTTCAGTATC |
| <i>Il6</i>     | F | CGGAGAGGAGACTTCACAGA   | <i>Reg3b</i>   | F | GGCTTCATTCTTGTCTCCA       |
|                | R | CCAGTTTGGTAGCATCCATC   |                | R | TCCACCTCCATTGGGTTCT       |
| <i>Il10</i>    | F | CTATGCTGCCTGCTCTTACTG  | <i>Ripk3</i>   | F | GAGATGGAAGACACGGCACT      |
|                | R | AACCCAAGTAACCCTTAAAGTC |                | R | GGTGGTGCTACCAAGGAGTT      |
| <i>Il12p35</i> | F | CGCAGCACTTCAGAATCACA   | <i>Tbp</i>     | F | CAAACCCAGAATTGTTCTCCTT    |
|                | R | TCTCCCACAGGAGGTTTCTG   |                | R | ATGTGGTCTTCCTGAATCCCT     |
| <i>Il17a</i>   | F | TCCAGAAGGCCCTCAGACTA   | <i>Tgfa</i>    | F | CTACTCGCCAACCGCAGG        |
|                | R | TGAGCTTCCAGATCACAGA    |                | R | ACAGCTAACAGGATACCCAGC     |
| <i>Il18</i>    | F | CAGGCCTGACATCTTCTGCAA  | <i>Tgfb1</i>   | F | GCCCTGGATACCAACTATTGC     |
|                | R | CTGACATGGCAGCCATTGT    |                | R | AAGTTGGCATGGTAGCCCTT      |
| <i>Il22</i>    | F | TTGAGGTGTCCAACCTCCAGCA | <i>Tnf</i>     | F | CCCCTCTGACCCCTTTACT       |
|                | R | AGCCGGACATCTGTGTTGTTA  |                | R | TTTGAGTCCTTGATGGTGGT      |
| <i>Il22bp</i>  | F | CAAGATGTATGGACAGAGCCA  |                |   |                           |
|                | R | GGTTATAGTCACGACCGGAG   |                |   |                           |



## **Supplemental Experimental Procedures**

### **Antibodies and reagents**

PerCP-Cy5.5-labeled anti-CD3, PerCP-Cy5.5-labeled anti-CD19, APC-Cy7-labeled anti-CD4, PE-labeled anti-NKp46, PE-labeled anti-ROR $\gamma$ t, biotin-labeled anti-IL-7R, PE-labeled anti-IL-17A, biotin-labeled anti-CD3, FITC-labeled anti-CD19, PE-labeled anti-CD11c, PE-Cy7-labeled anti-CD19, APC-labeled anti-CD103 antibodies and avidin-PE-Cy7 were from eBioscience. Alexa Fluor 647-labeled anti-IL-22 antibody was from BioLegend. APC-labeled anti-CCR6, FITC-labeled anti-CD25, PerCP-Cy5.5-labeled anti-CD11b, APC-labeled CD11c, APC-Cy7-labeled anti-CD11b anti-HSP90, and anti- $\beta$ -actin antibodies were from BD Biosciences. Anti-RelB, anti-p100/52, anti-I $\kappa$ B $\alpha$ , anti-phospho I $\kappa$ B $\alpha$ , anti-phospho IKK $\alpha/\beta$ , anti-Erk, anti-phospho Erk, anti-JNK, and anti-phospho JNK antibodies were from Cell Signaling Technology. Anti-RelA, anti-cRel, anti-p105/50, anti-IKK  $\alpha/\beta$ , anti-I $\kappa$ B $\epsilon$  and anti-caspase-1 antibodies were from Santa Cruz. Anti-IL-1 $\beta$  antibody was from R&D Systems. Anti-RIPK3 antibody was from ProSci. Anti-caspase 8 antibody and z-VAD-fmk was from Enzo Life Sciences. Anti-BRG1 ATPase antibody was kindly provided by Dr. Anthony Imbalzano (UMMS). SMAC mimetic, LBW242, was kindly provided from Novartis.

### **Metagenomic analysis**

The PCR primers developed against the V4 variable region of the 16S rRNA gene (F515/R806) were used (Caporaso et al 2011). PCR reaction was performed using the HotStarTaq Plus Master Mix Kit (Qiagen) under the following conditions: 94°C for 3 minutes, followed by 28 cycles of 94°C for 30 seconds, 53°C for 40 seconds and 72°C for 1 minute, after which a final elongation step at 72°C for 5 minutes. Sequencing was performed at MR DNA on an Ion Torrent PGM

according to the manufacturer's protocol. Sequence data were processed using a proprietary analysis pipeline (MR DNA). Operational taxonomic units (OTUs) were defined by clustering at 3% divergence (97% similarity). Final OTUs were taxonomically classified using BLASTn against a curated GreenGenes database (DeSantis et al 2006).

### **Imaging flow cytometry**

BMDCs stimulated with 100 ng/ml LPS for two hours were fixed and permeabilized with Fixation/Permeabilization solution (eBiosciences) for 30 minutes at 4°C and washed with Permeabilization buffer (eBiosciences). Cells were then incubated in Permeabilization buffer supplemented with 10% normal goat serum (Sigma) for 30 minutes, followed by RelB antibody (Cell Signaling) for 45 minutes at room temperature. After washing, cells were incubated with Alexa fluor 488-conjugated secondary anti-rabbit antibody (Molecular Probe) for 45 minutes at room temperature. For last 15 minutes of the incubation with secondary antibody, cells were stained with 2 µg/ml Hoechst 33342 to visualize the nuclei (Molecular Probe). The cells were analyzed by FlowSight Analyzer (Amnis EMD Millipore). The percentage of the cells showing RelB nuclear translocation was calculated using IDEAS v5.0 program (EMD Millipore).

### **Measurement of intracellular reactive oxygen species**

BMDCs were treated with 10 µM CM-H<sub>2</sub>DCFDA in PBS at 37°C for 30 minutes. After washing twice with culture media, the cells were incubated at 37°C for 30 minutes and subsequently stimulated with 100 ng/ml LPS for 6 hours. After washing twice with PBS, the cells were analyzed by LSRII (BD Biosciences).

### **Flow cytometry for ILCs**

Cells from spleen and mesenteric lymph nodes were stained with a combination of antibodies against surface antigens. For intracellular staining of ROR $\gamma$ t, cells were fixed, permeabilized by fixation/permeabilization solution (eBioscience), and then stained for ROR $\gamma$ t. The cells were analyzed by LSR II (BD Biosciences).

### **Intracellular staining of IL-22 in ILCs**

Splenocytes were stimulated with 25 or 100 ng/ml recombinant mouse IL-23 (BioLegend). Four hours after stimulation with IL-23, 10 ng/ml PMA (Sigma) and 1  $\mu$ g/ml ionomycin (Sigma) were added to the culture for an additional four hours. Golgi Plug (BD Biosciences) was added three hours before harvest. Cells were first stained with antibodies against surface antigens. After fixation and permeabilization with BD Cytofix/Cytoperm kit (BD Biosciences), cells were stained for IL-22 and IL-17A. The cells were analyzed by LSR II (BD Biosciences).

### **Cell death assay**

For TUNEL staining, cells were permeabilized with 0.1% Tritin X-100 after fixation with paraformaldehyde and stained with the *in situ* cell death detection kit, fluorescein (Roche) as per manufacturer's protocol. For Annexin V and PI staining, cells were stained with 50  $\mu$ g/ml PI and Annexin V (BD Bioscience) in Annexin V buffer (10 mM HEPES, 140 mM NaCl, 2.5 mM CaCl<sub>2</sub>). The cells were analyzed by LSR II (BD Biosciences). Annexin V and/or PI positive cells were defined as dead cells. For LDH assay, CytoTox 96 Non-Radioactive Cytotoxicity Assay kit (Promega) was used.

## **Immunoprecipitation and immunoblotting**

Whole cell extracts were prepared in RIPA buffer or NP-40 lysis buffer. Secreted proteins in culture media were precipitated by TCA. For cytoplasmic and nuclear extracts, cells were lysed by resuspending in hypotonic buffer (20 mM Tris-HCl, pH 7.5, 10 mM NaCl, 3 mM MgCl<sub>2</sub>) for 15 min, followed by addition of 0.5% NP-40. After centrifugation at 3,000 rpm for 10 min, supernatants were collected as cytoplasmic extracts. The pellets were washed with PBS once followed by lysis with RIPA buffer for 30 min. After centrifugation at 14,000 rpm for 30 min, supernatants were collected as nuclear extracts. Protease inhibitor cocktail (Roche) and phosphatase inhibitor cocktail (Sigma) were included in all lysis buffers. For immunoprecipitation, WCEs precleared with Sepharose 6B (Sigma) for 1 hour were immunoprecipitated with anti-RelB antibody and anti-rabbit IgG-conjugated agarose (Sigma) overnight.  $\beta$ -actin and HSP90 were used as loading control. HSP90 and BRG1 ATPase were used as controls for cytoplasmic and nuclear proteins, respectively. Results are representative of two or three independent experiments.

## **EMSA**

Cells were lysed by resuspending in hypotonic buffer (10 mM HEPES, pH 7.9, 10 mM KCl, 0.1 mM EDTA, 0.1 mM EGTA, 1 mM DTT, 0.5 mM PMSF) for 15 minutes, followed by addition of 0.5% NP-40. After centrifugation and washing with hypotonic buffer once, the pellets were resuspended with high salt buffer (20 mM HEPES, pH 7.9, 0.4 M NaCl, 1 mM EDTA, 1 mM EGTA, 1 mM DTT, 1 mM PMSF) and incubated for 15 minutes at 4 °C. After centrifugation at 14,000 rpm for 10 minutes, supernatants were collected as nuclear extracts. Protease inhibitor cocktail (Roche) were added to nuclear extracts. Oligonucleotides from the  $\kappa$ B site in the

*Il23p19* gene promoter (5'-TAGGGAGGGGAATCCCACCTGC-3') were end labeled with [ $\gamma$ -<sup>32</sup>P] ATP (MP Biomedial) using the T4 polynucleotide kinase (NEB). Binding reactions were performed with 5  $\mu$ g of nuclear protein and 100,000 cpm of labeled oligonucleotides in 10  $\mu$ l reaction mixture containing 10 mM Tris-HCl pH 7.5, 150 mM KCl, 0.5 mM EDTA, 12.5% Glycerol, 0.1% Triton X-100, 1 mM DTT, 0.5  $\mu$ g/ml Poly dIdC on ice for 30 minutes. Reaction mixtures were resolved on a 4% nondenaturing polyacrylamide gel at 15 mA for 2 hours in 0.5x TBE buffer. Gels were dried, exposed to a phosphor screen, and visualized by a phosphor imager. Immunodepletion was performed by incubating nuclear extracts with anti-RelA, cRel, p52, and/or RelB antibodies and anti-rabbit IgG-conjugated agarose (Sigma). To ensure the complete depletion, this procedure was repeated three times. After immunodepletion, supernatant was collected and 5  $\mu$ g of it was used for EMSA reaction.

## **Q-PCR**

Primer sequences used in this study are summarized in Table S2.
